# Supplementary figures and images for: Investigation into the Thermal Response and Pharmacological Activity of Substituted Schiff Bases on α-Amylase and α-Glucosidase
Source: MDPI journal article supplement (doi:10.3390/antiox7090113), 2018-08-28

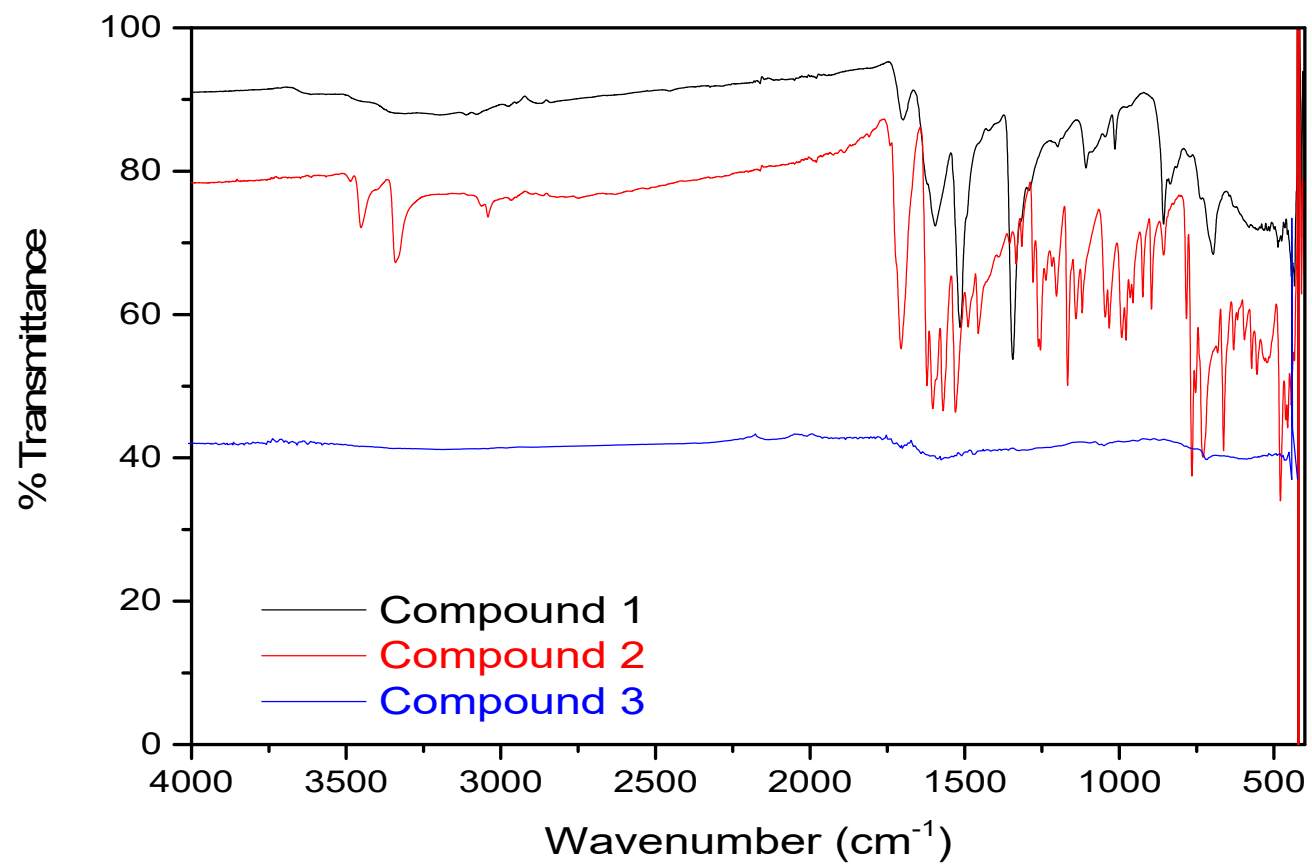

**Figure S1:** FT-IR spectrum of Schiff bases **1-3**

Supplement: s1 [file s1]

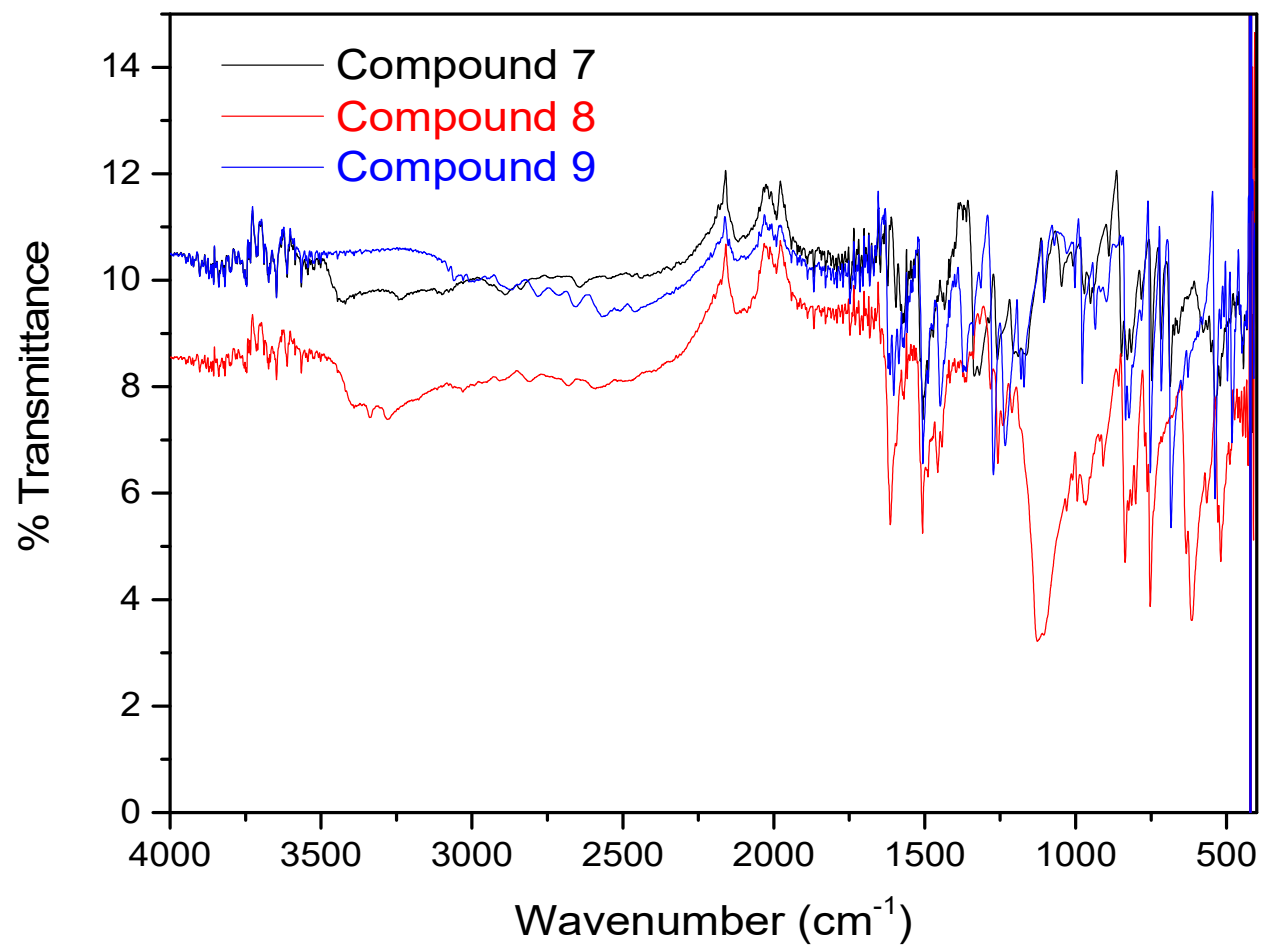

**Figure S3:** FT-IR spectrum of Schiff bases 7-9

Supplement: s1 [file s1]

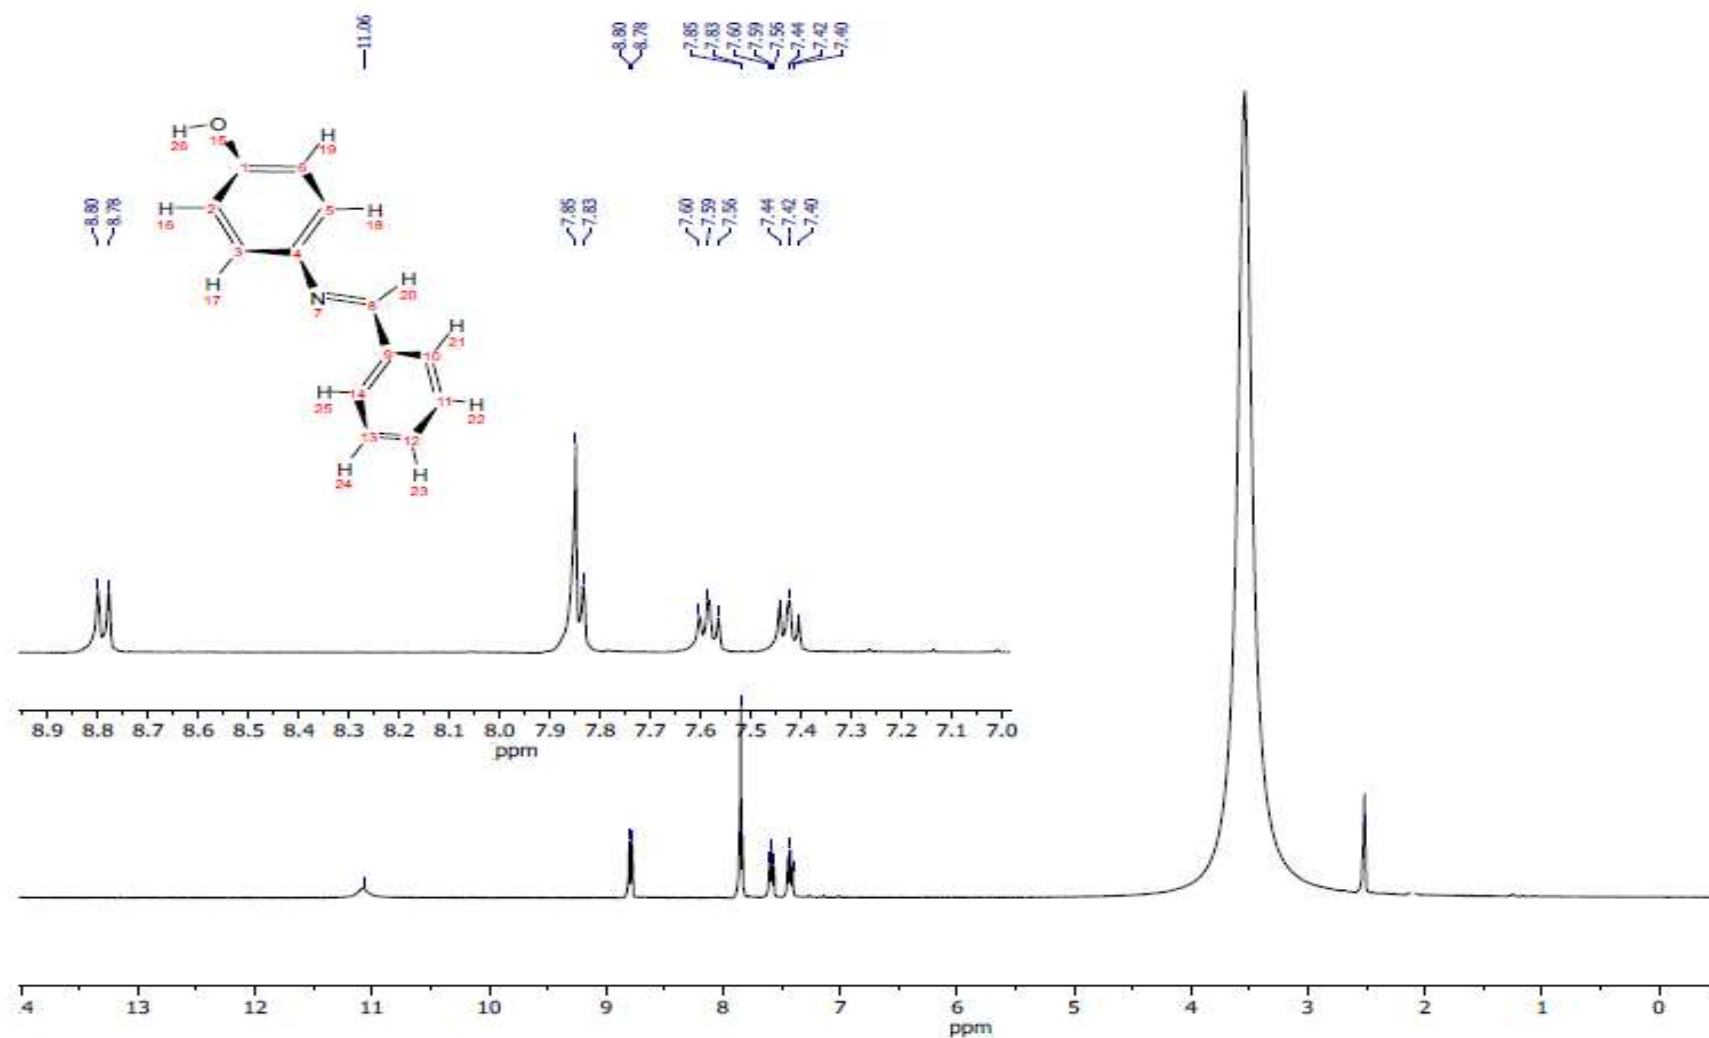

Figure S14:  $^1\text{H}$  NMR of Schiff base 6

Supplement: s1 [file s1]

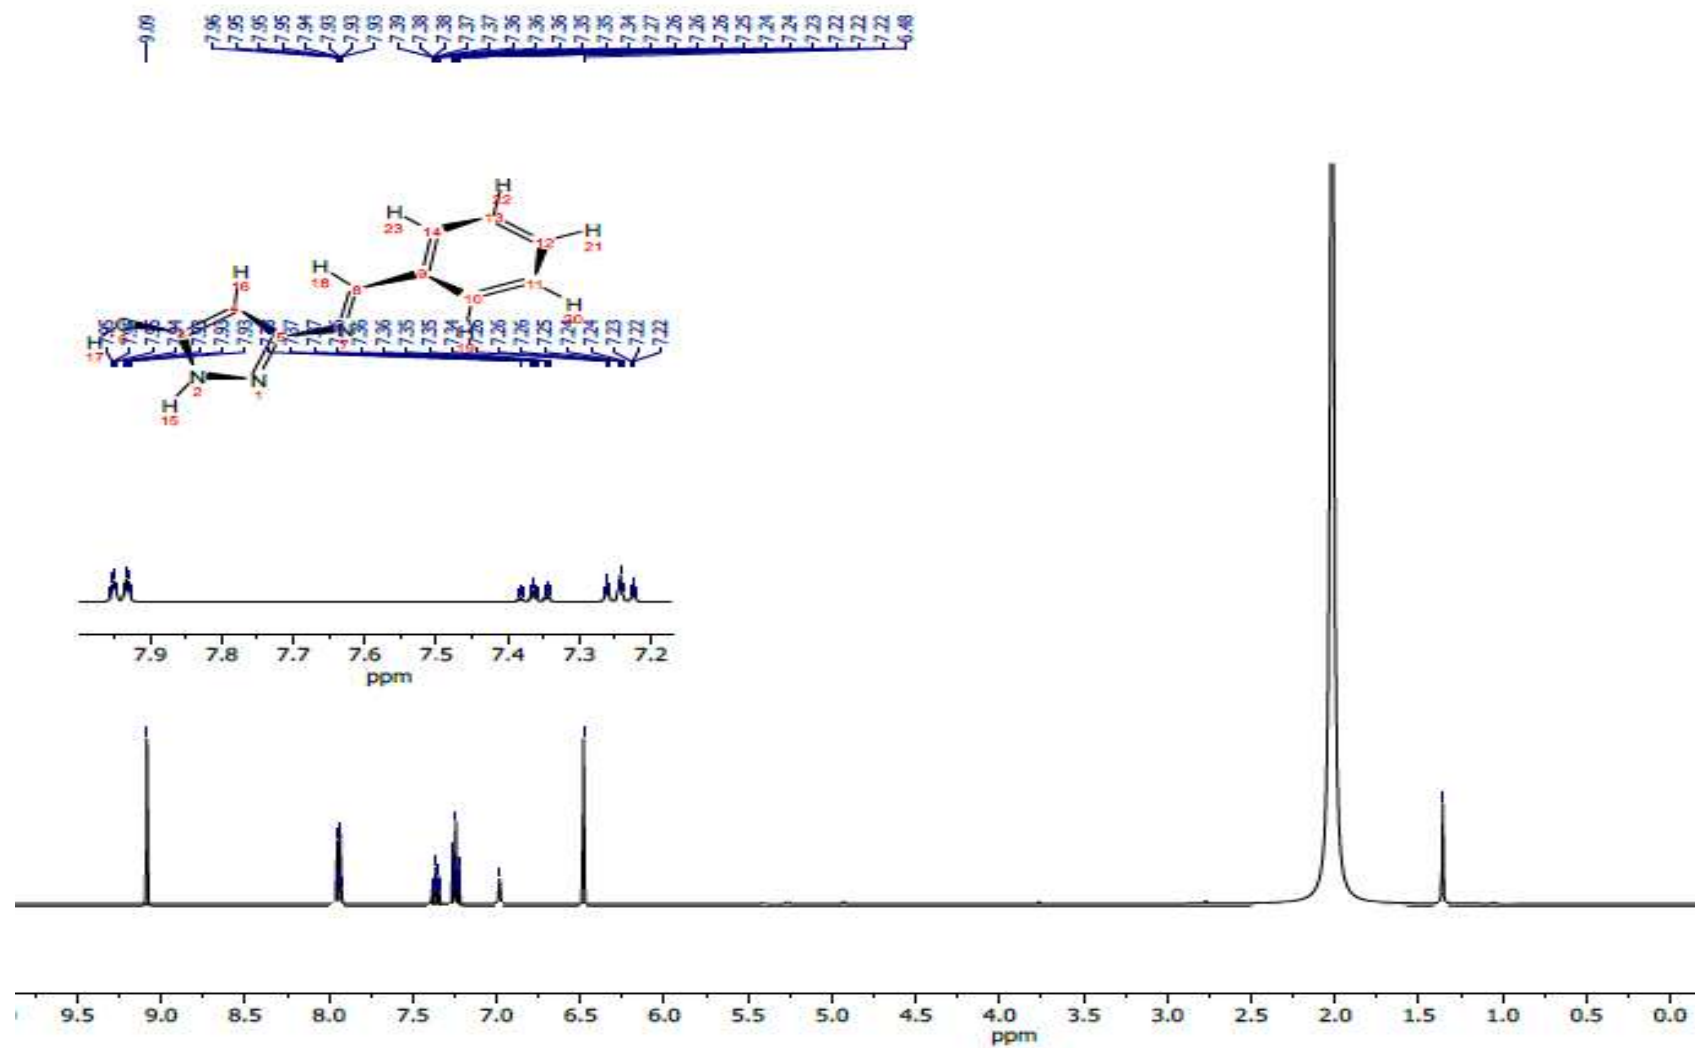

Figure S8:  $^1\text{H}$  NMR of Schiff base 3

Supplement: s1 [file s1]

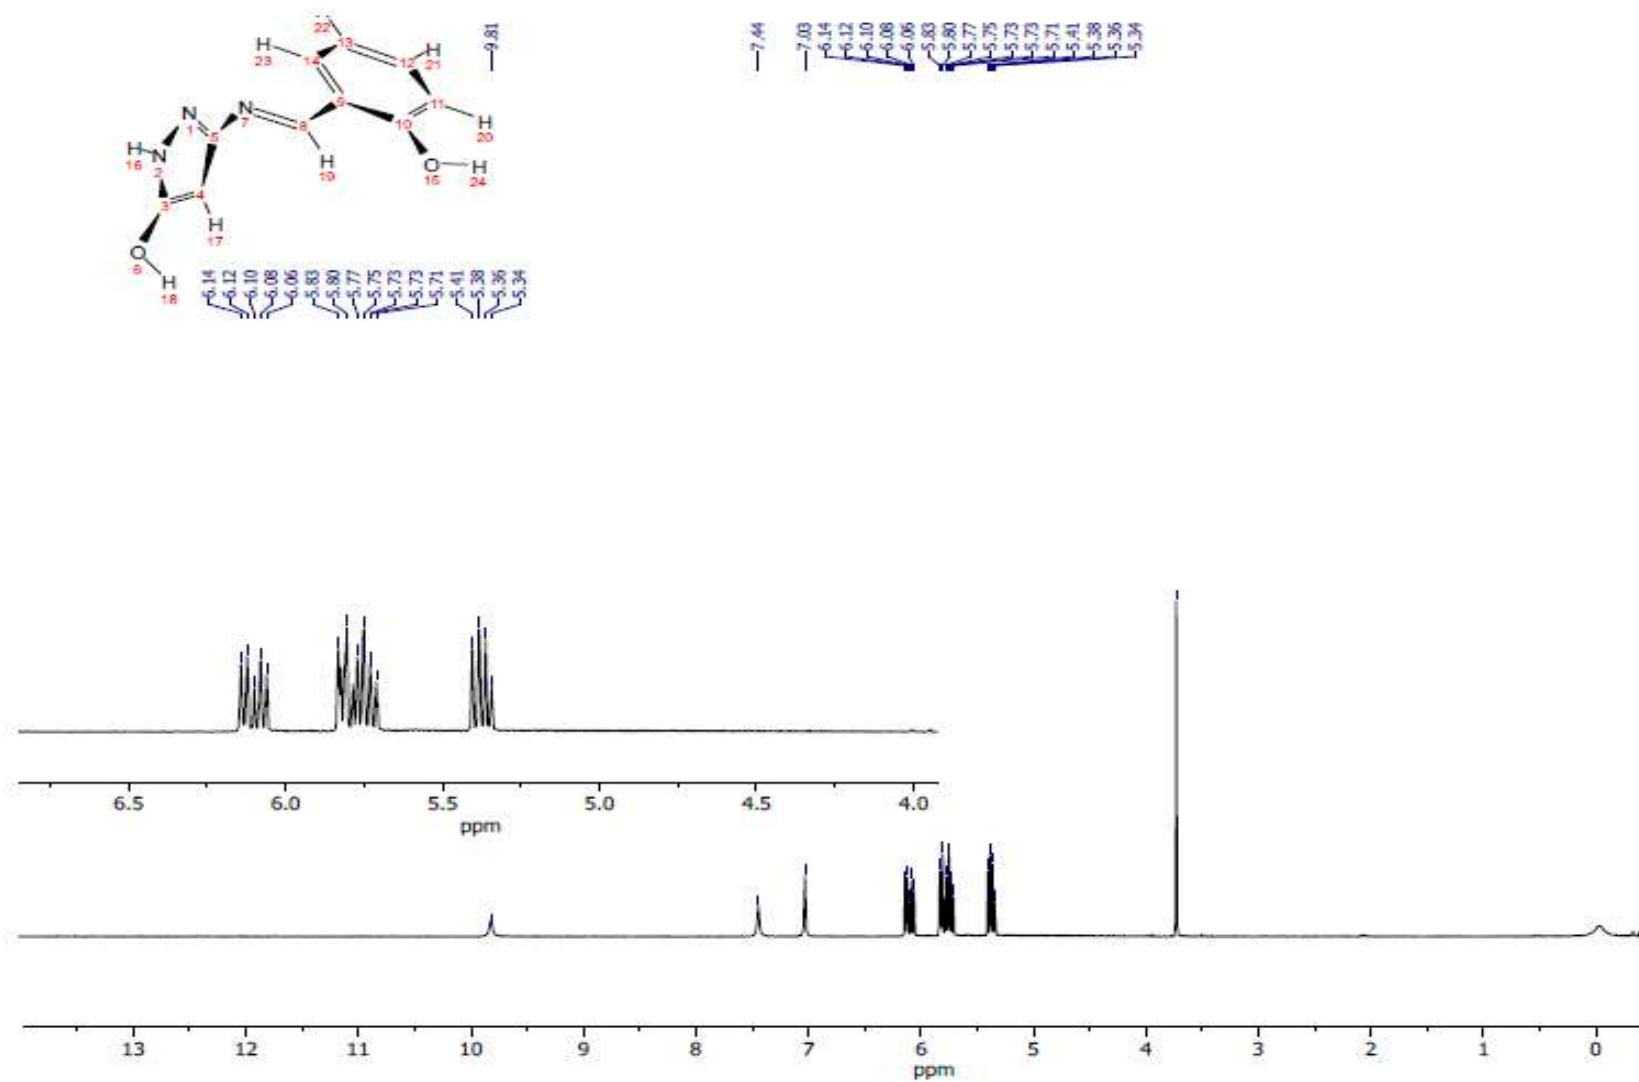

Figure S6:  $^1\text{H}$  NMR of Schiff base 2

Supplement: s1 [file s1]

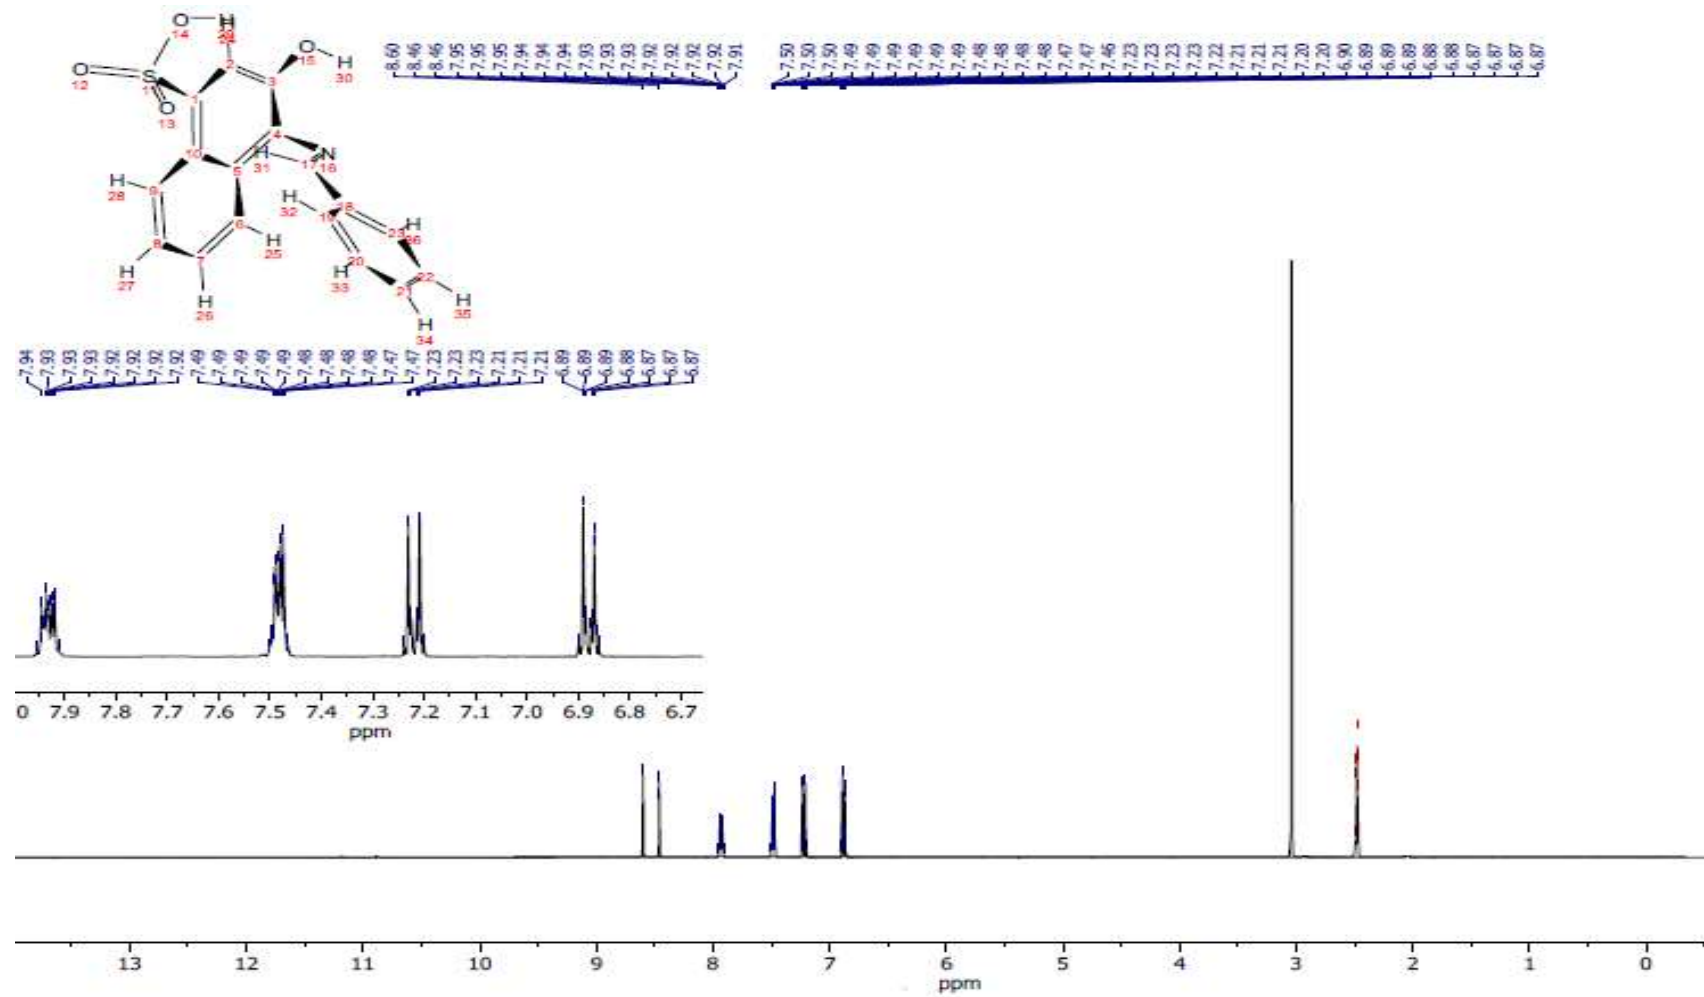

Figure S20:  $^1\text{H}$  NMR of Schiff base 9

Supplement: s1 [file s1]

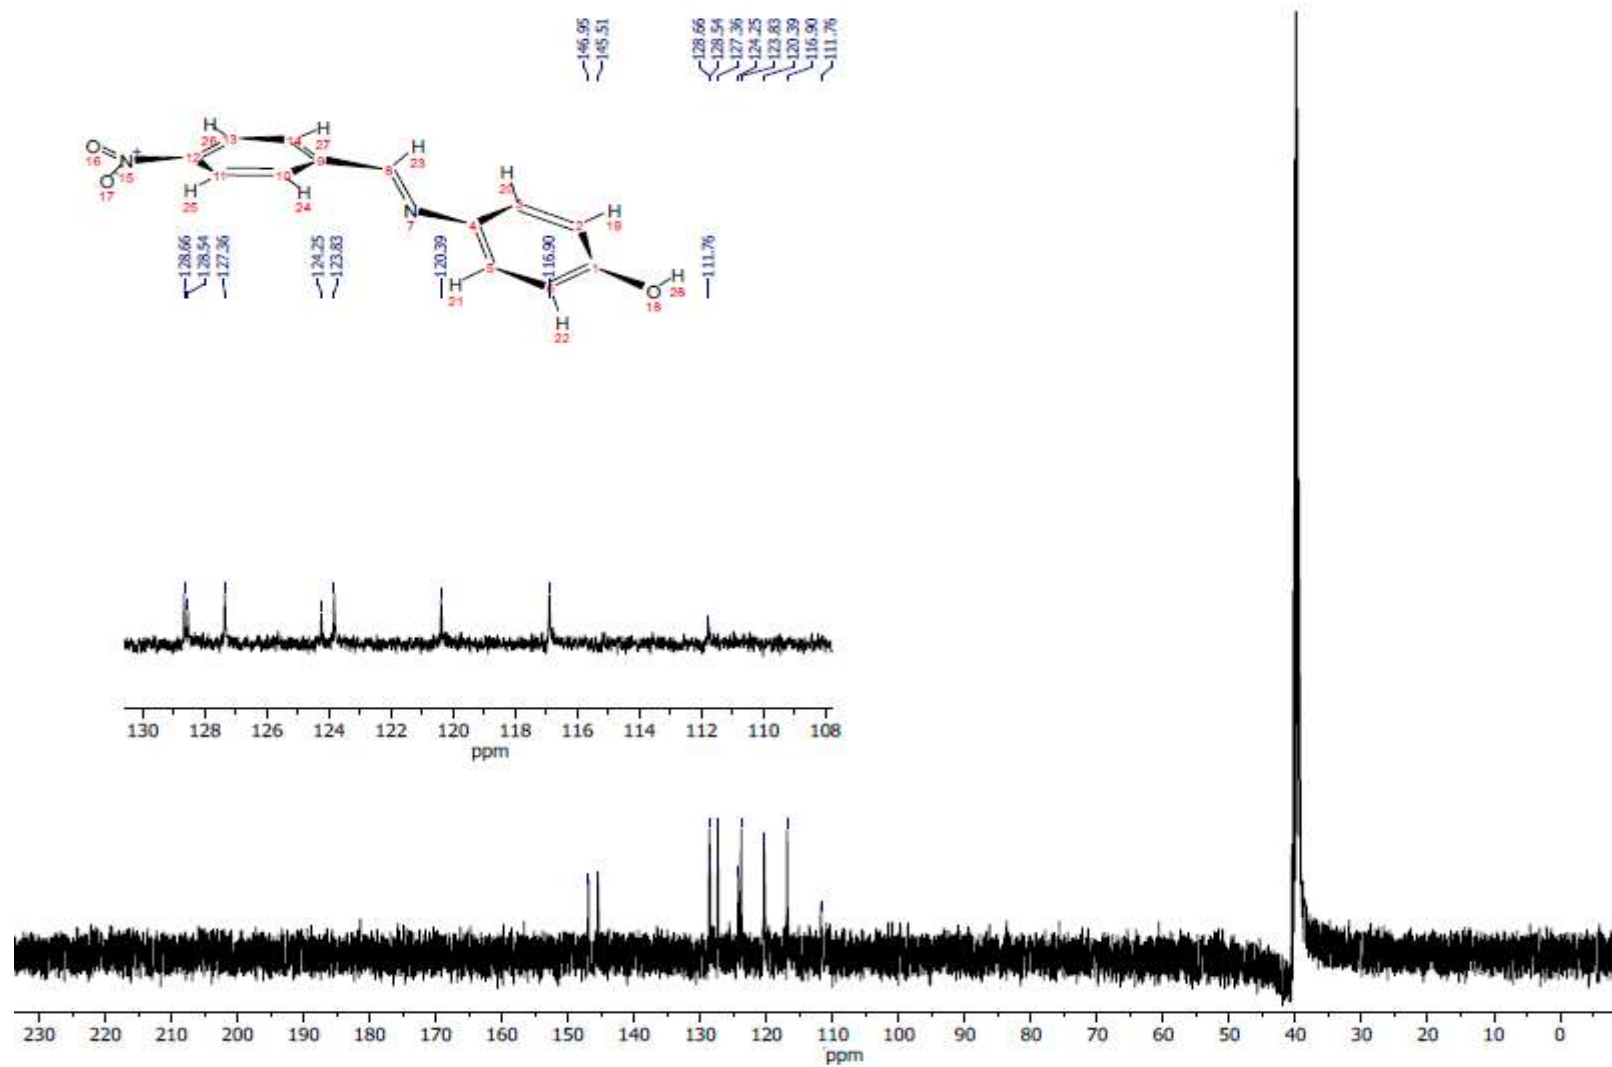

Figure S13:  $^{13}\text{C}$  NMR of Schiff base 5

Supplement: s1 [file s1]

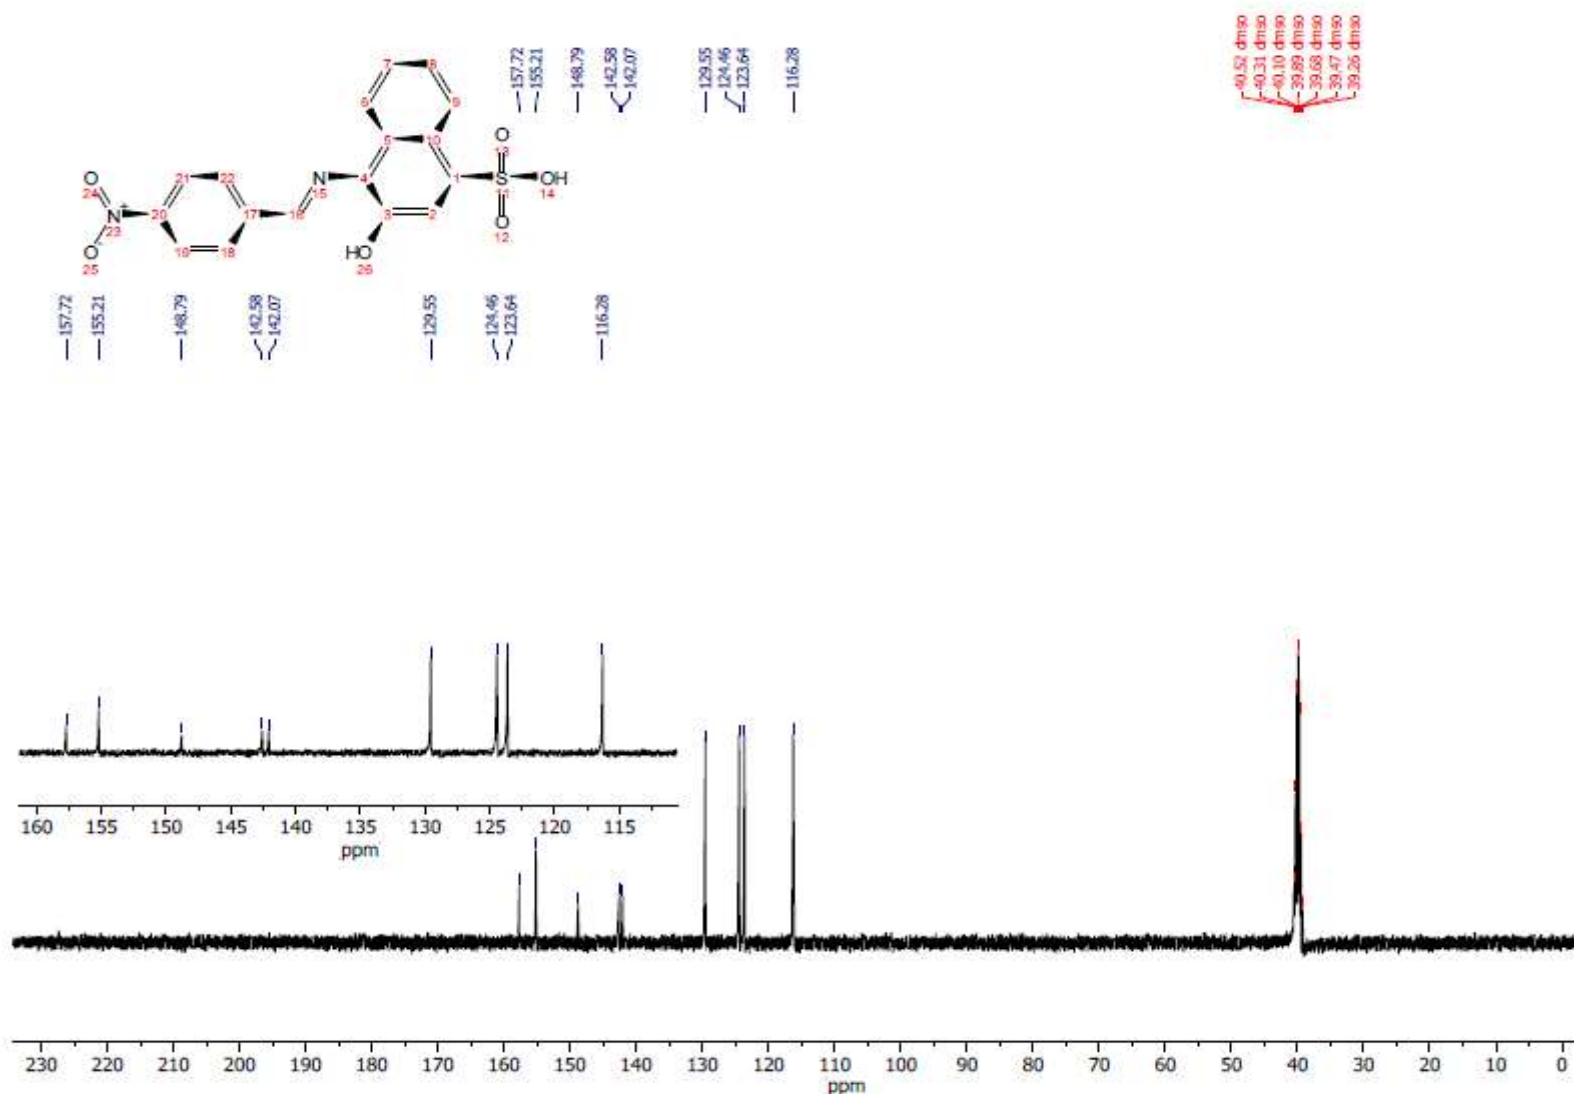

Figure S17:  $^{13}\text{C}$  NMR of Schiff base 7

Supplement: s1 [file s1]

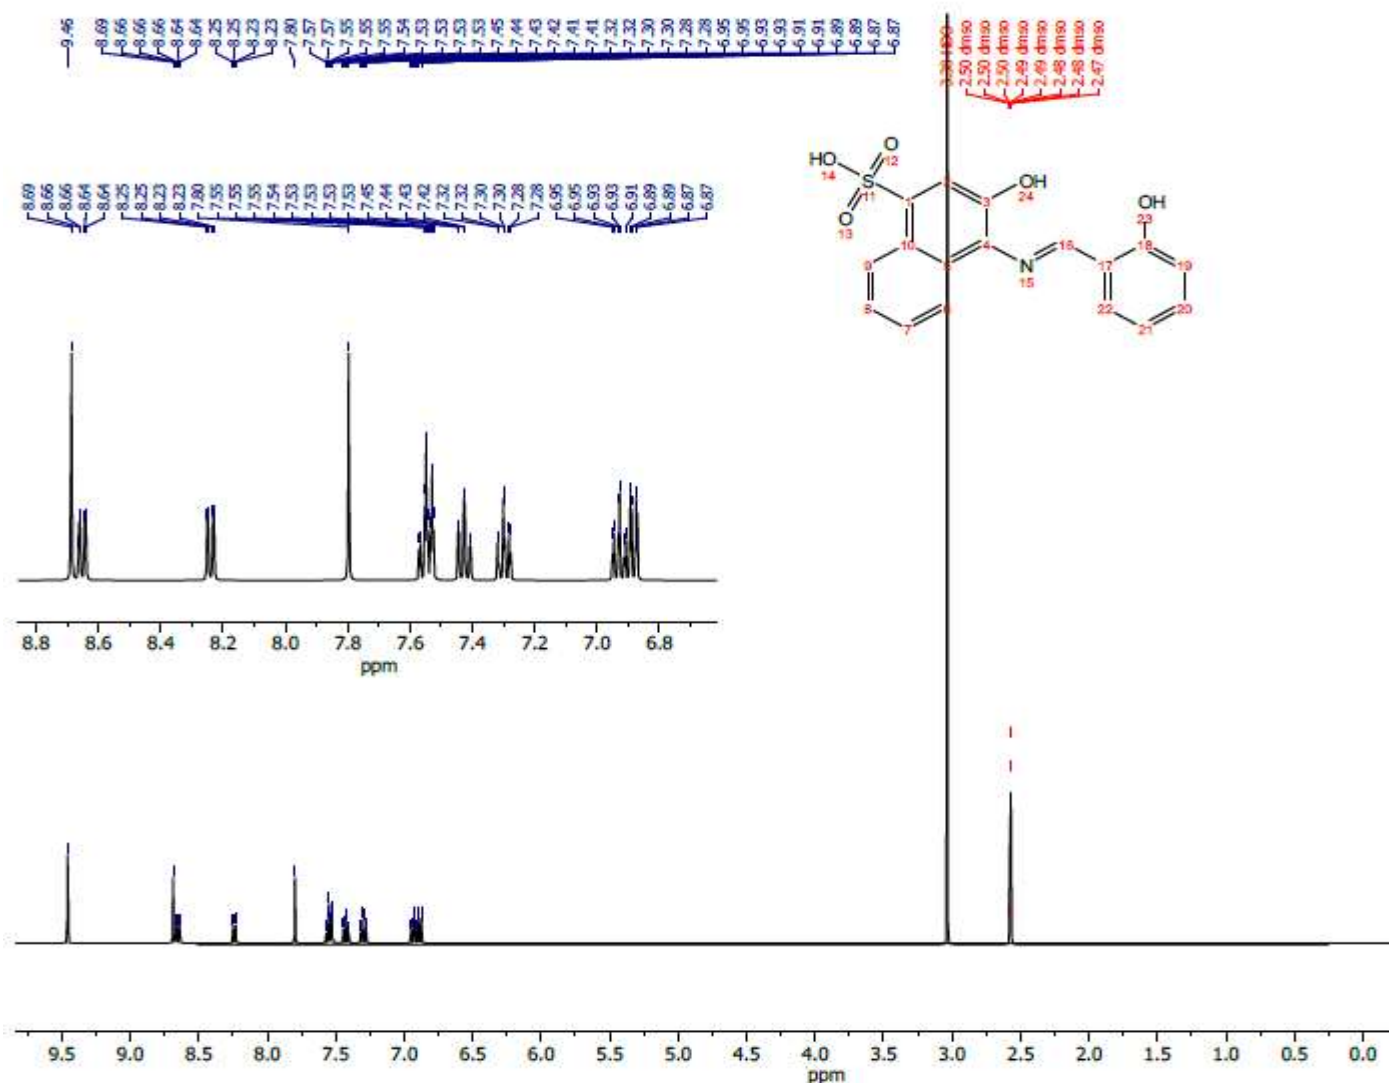

Figure S18:  $^1\text{H}$  NMR of Schiff base 8

Supplement: s1 [file s1]

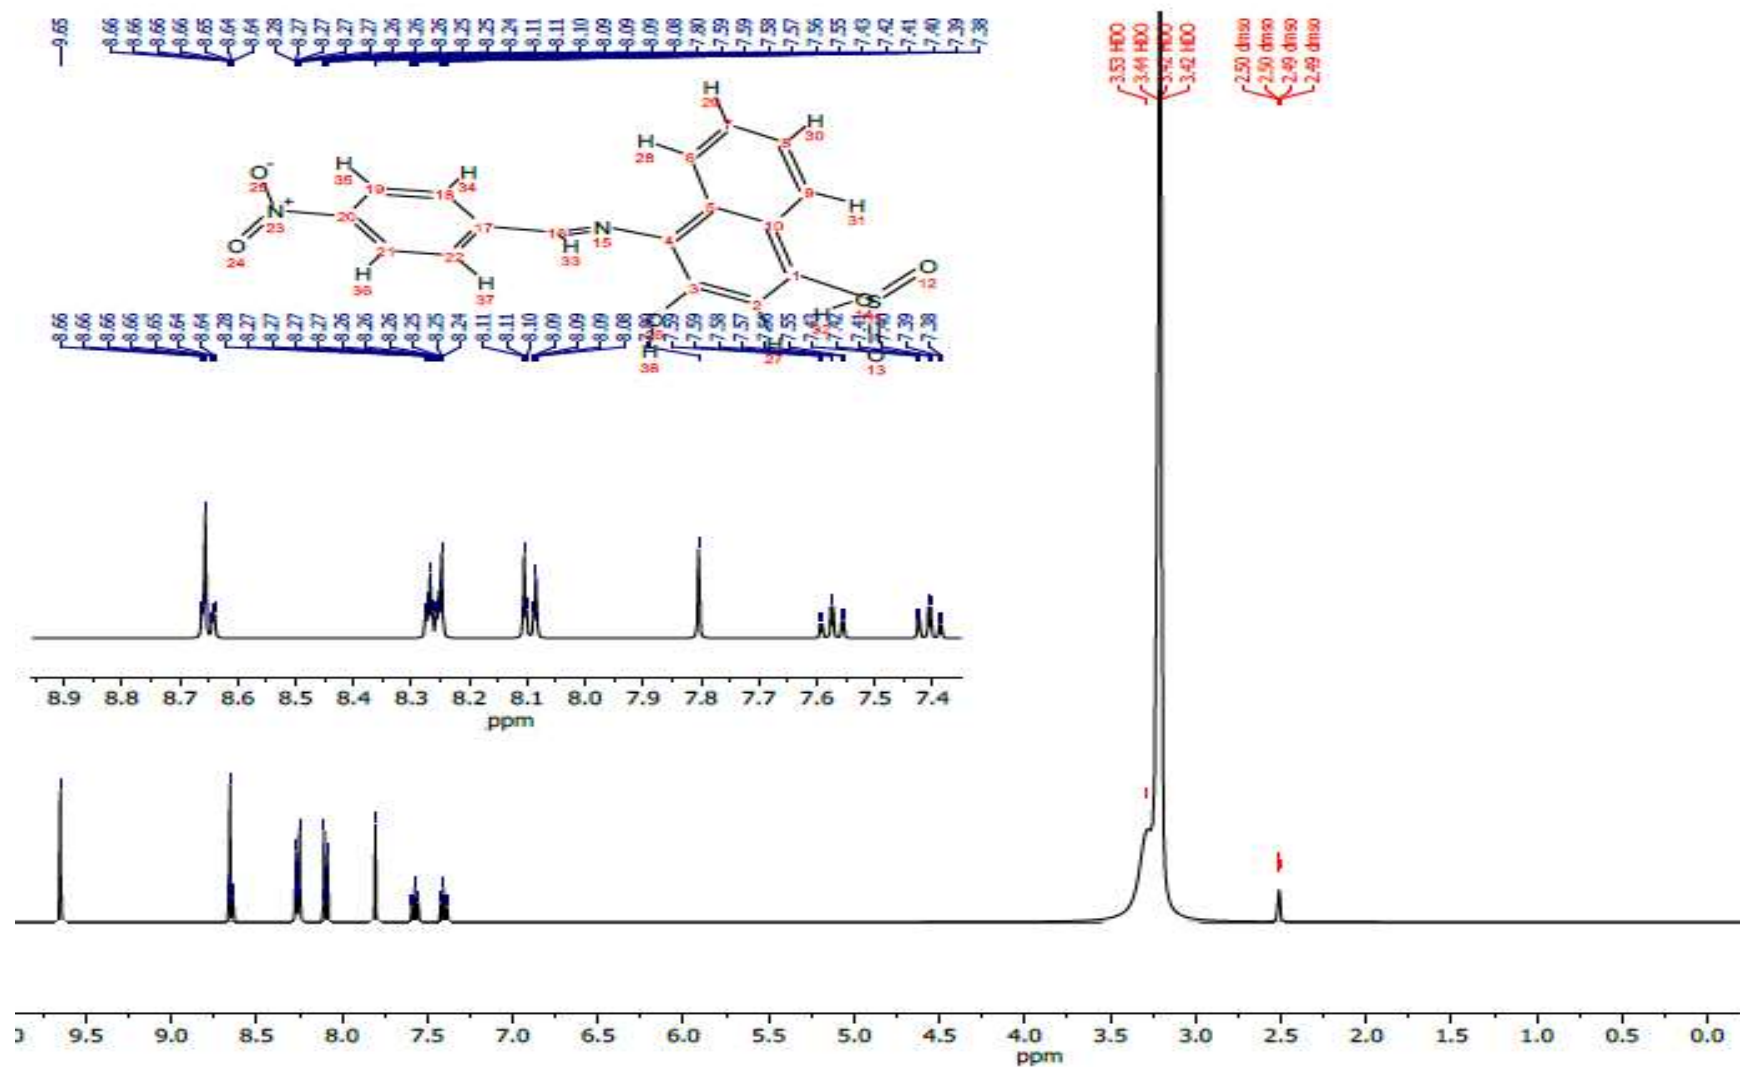

Figure S16:  $^1\text{H}$  NMR of Schiff base 7

Supplement: s1 [file s1]

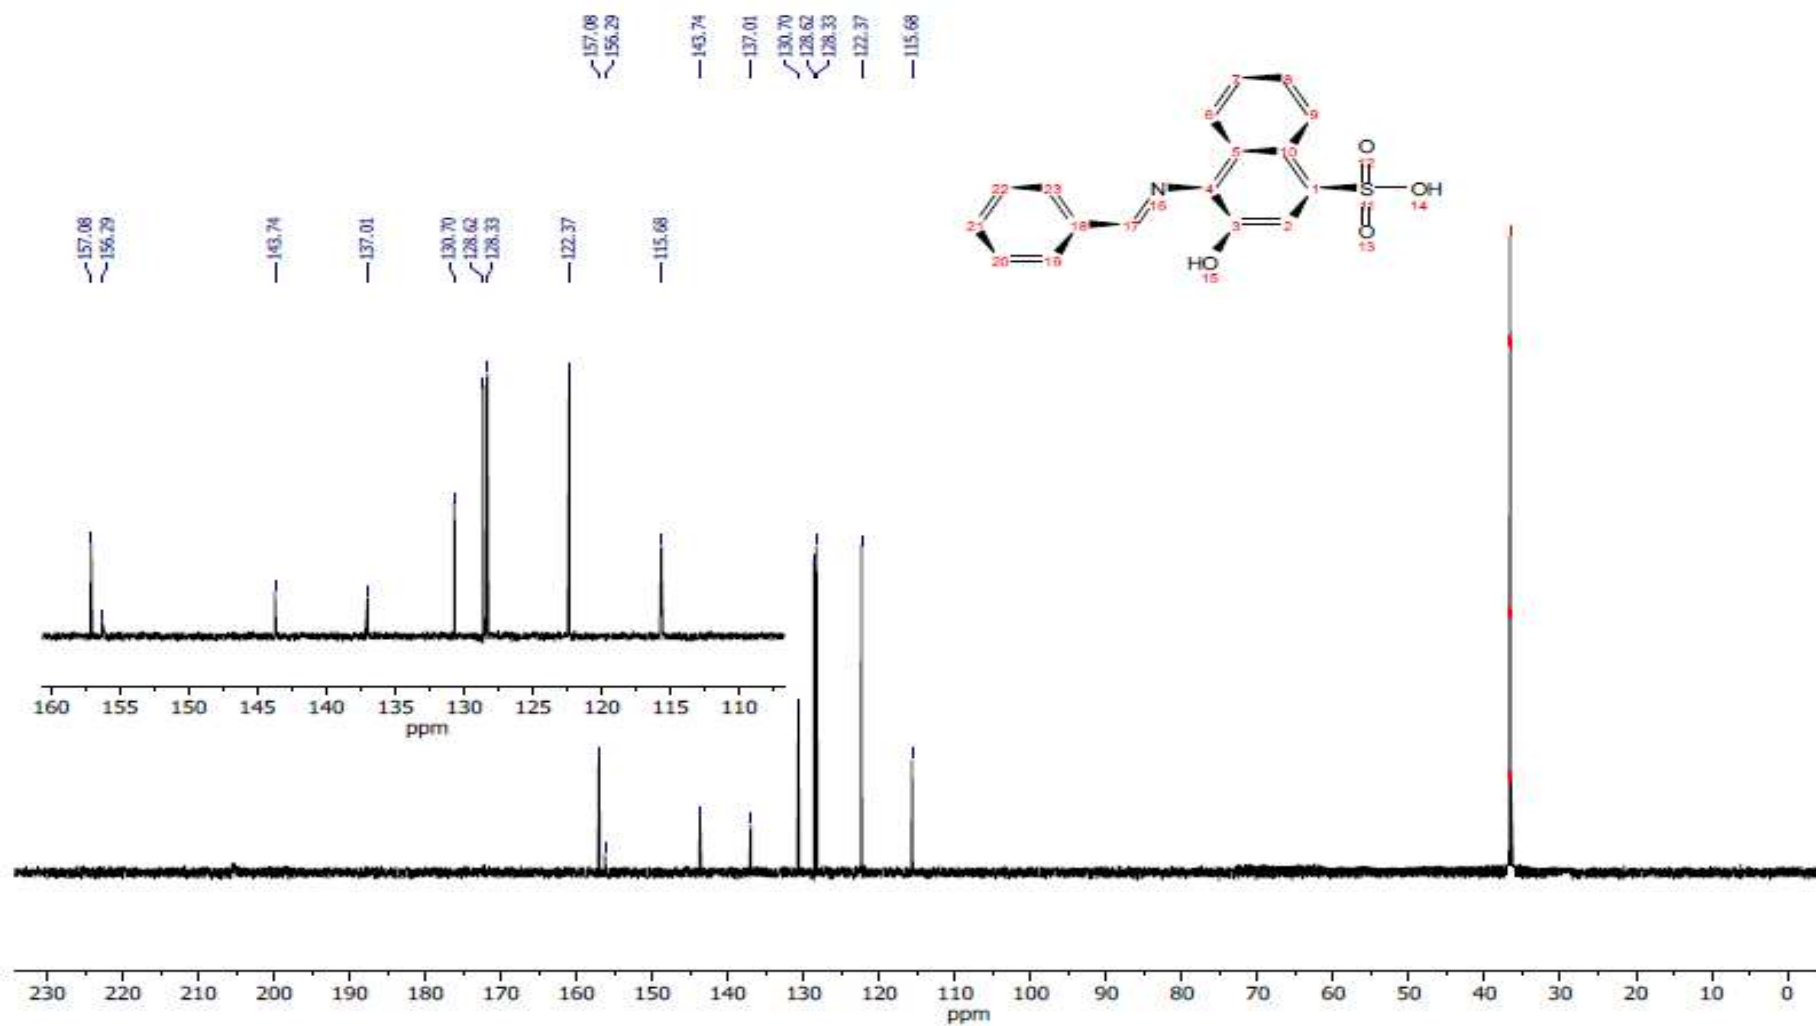

Figure S21:  $^{13}\text{C}$  NMR of Schiff base 9

Supplement: s1 [file s1]

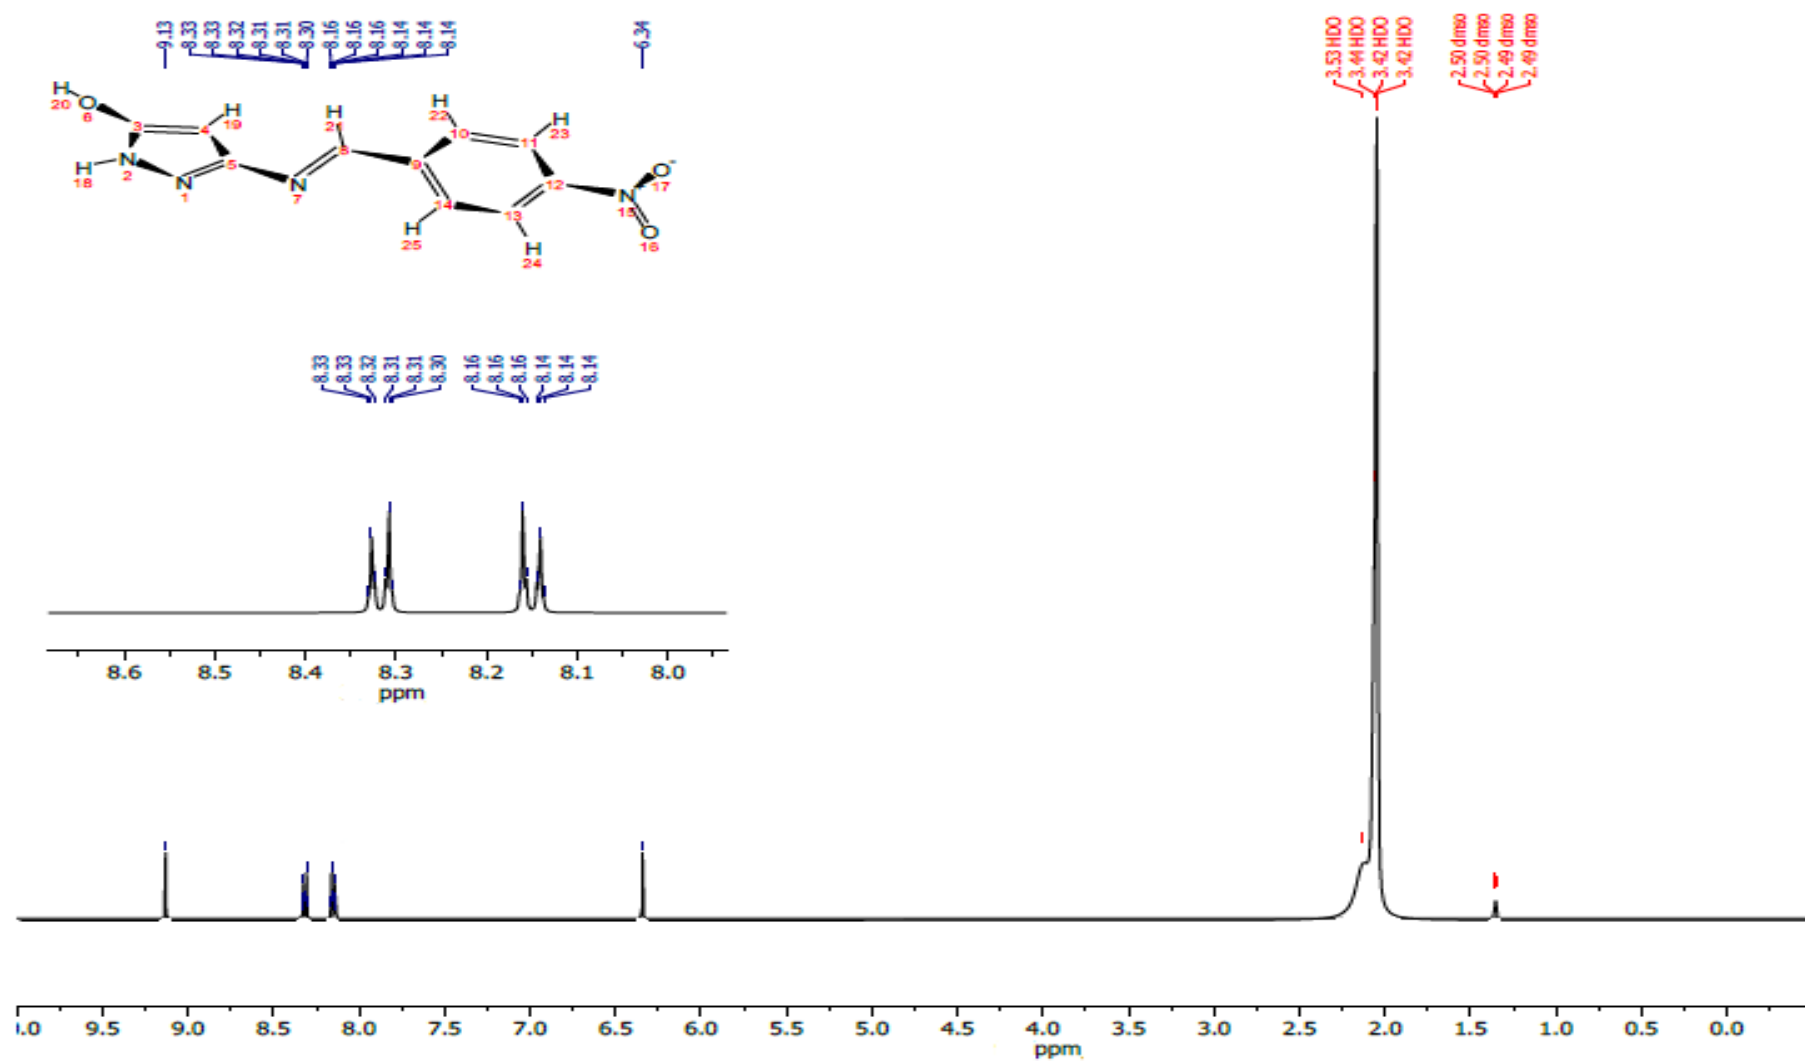

Figure S4:  $^1\text{H}$  NMR of Schiff base 1

Supplement: s1 [file s1]

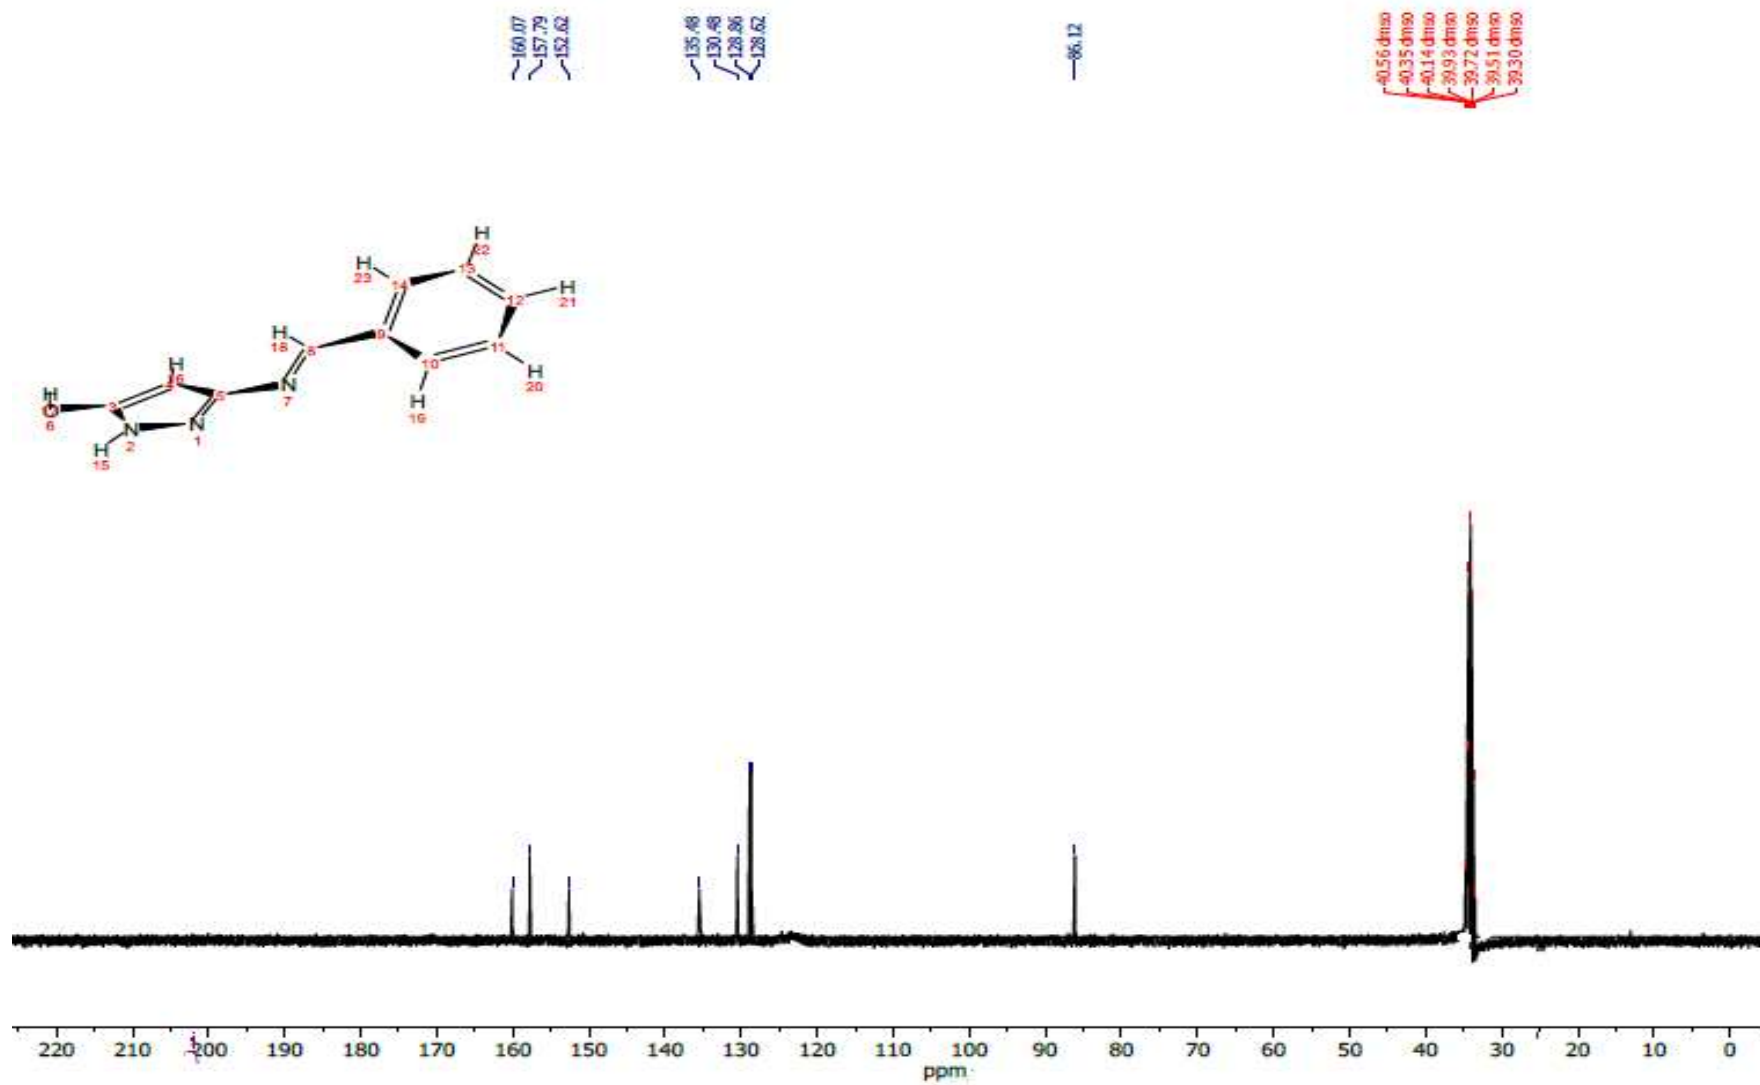

Figure S9:  $^{13}\text{C}$  NMR of Schiff base 3

Supplement: s1 [file s1]

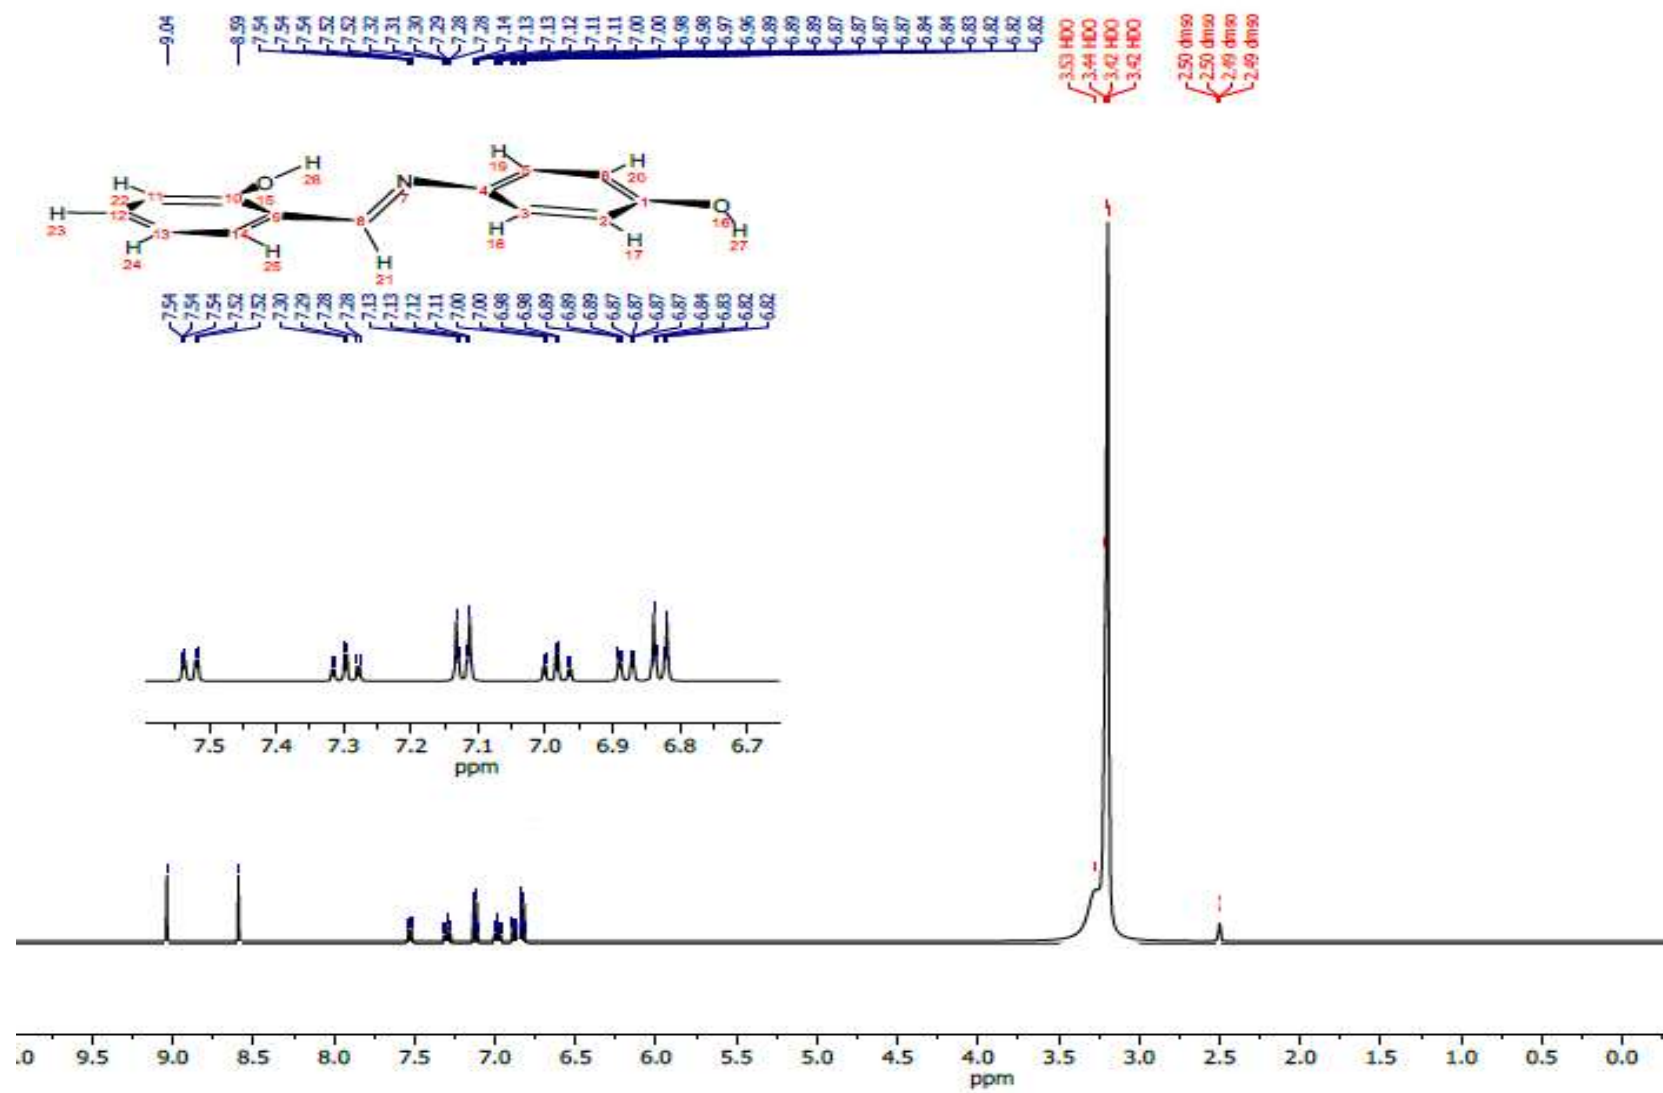

Figure S12:  $^1\text{H}$  NMR of Schiff base 5

Supplement: s1 [file s1]

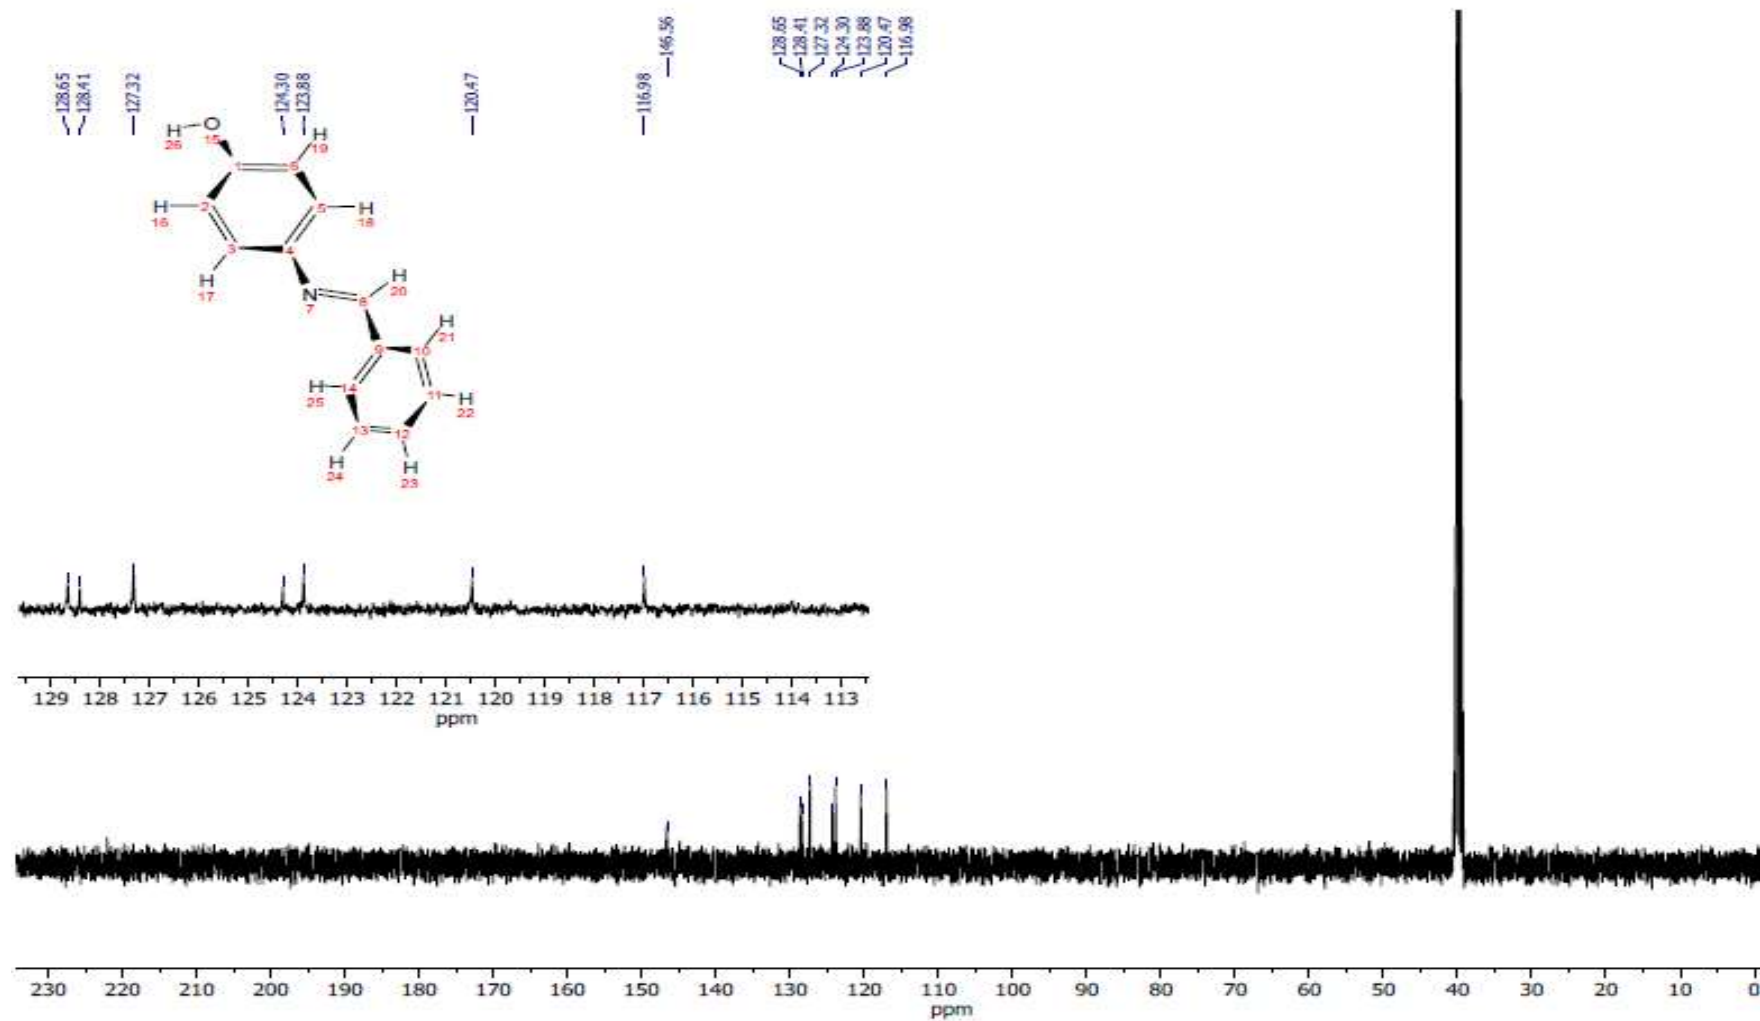

Figure S15:  $^{13}\text{C}$  NMR of Schiff base 6

Supplement: s1 [file s1]

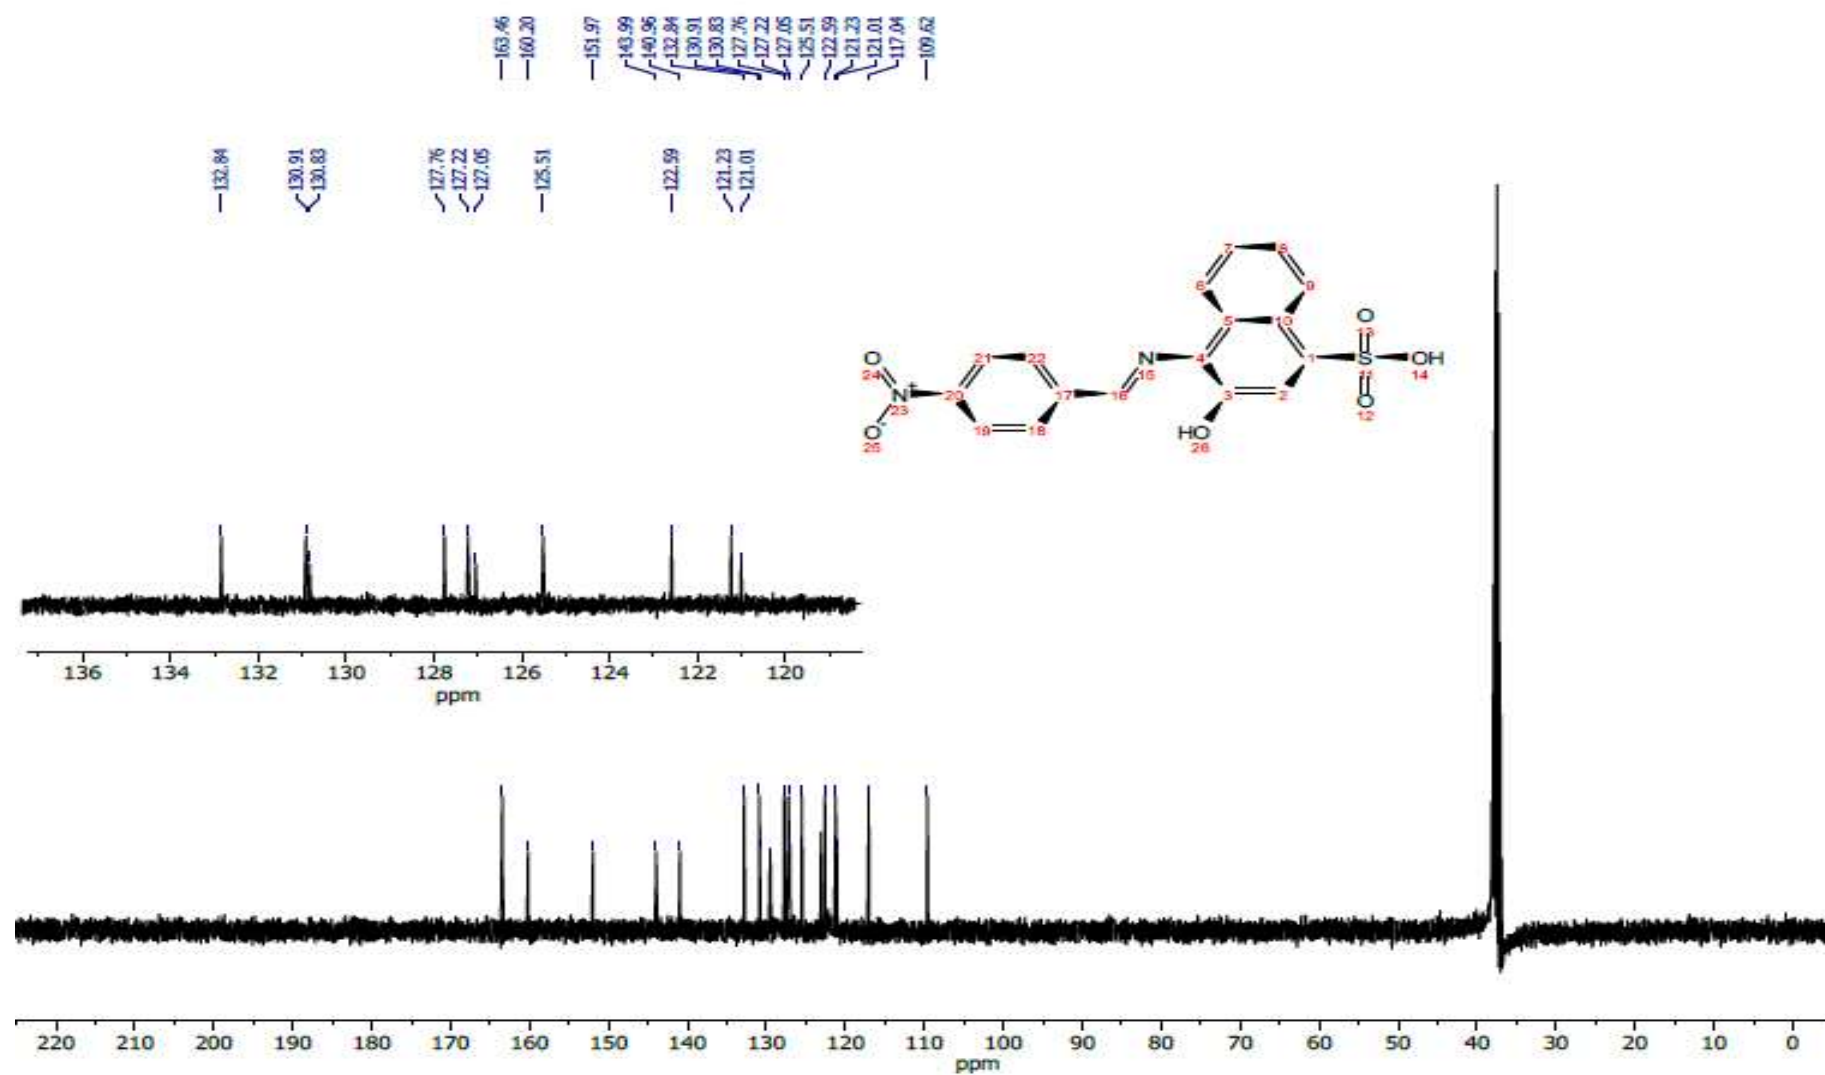

Figure S19: <sup>13</sup>C NMR of Schiff base 8

Supplement: s1 [file s1]

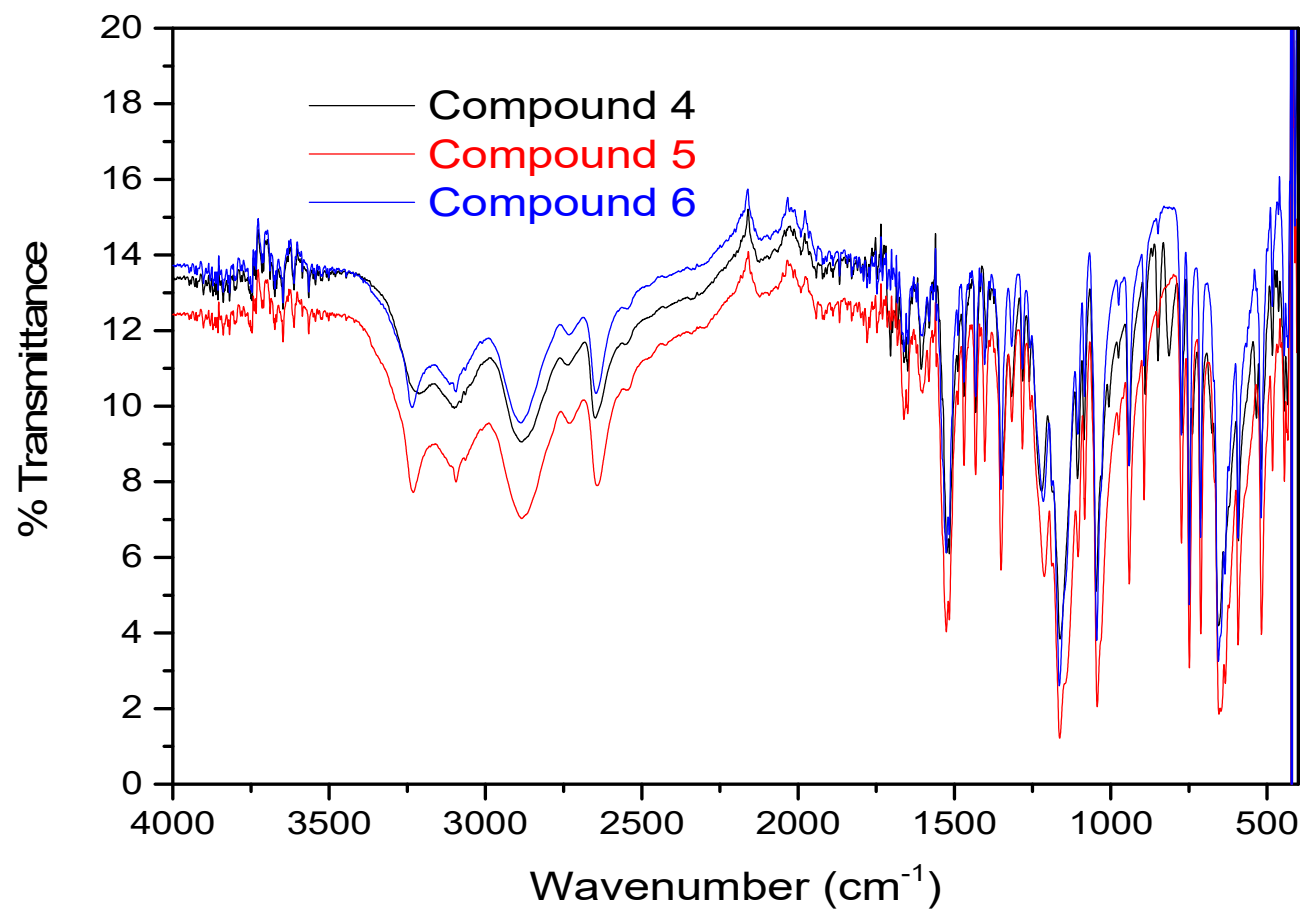

**Figure S2:** FT-IR spectrum of Schiff bases 4-6

Supplement: s1 [file s1]

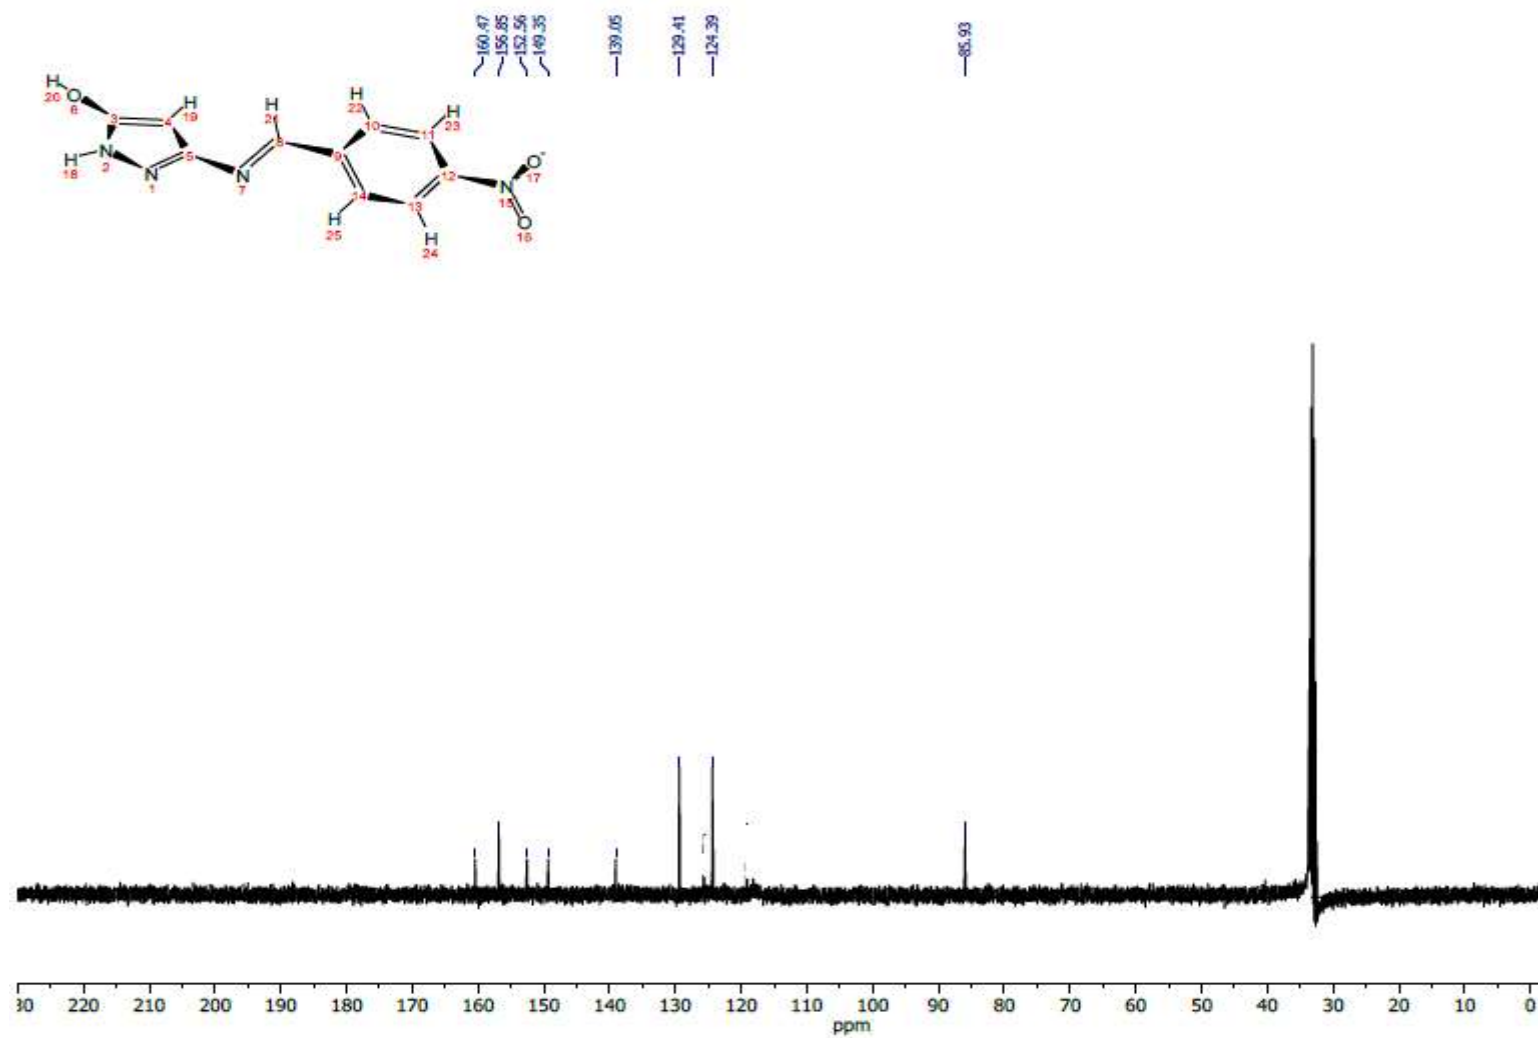

Figure S5:  $^{13}\text{C}$  NMR of Schiff base 1

Supplement: s1 [file s1]

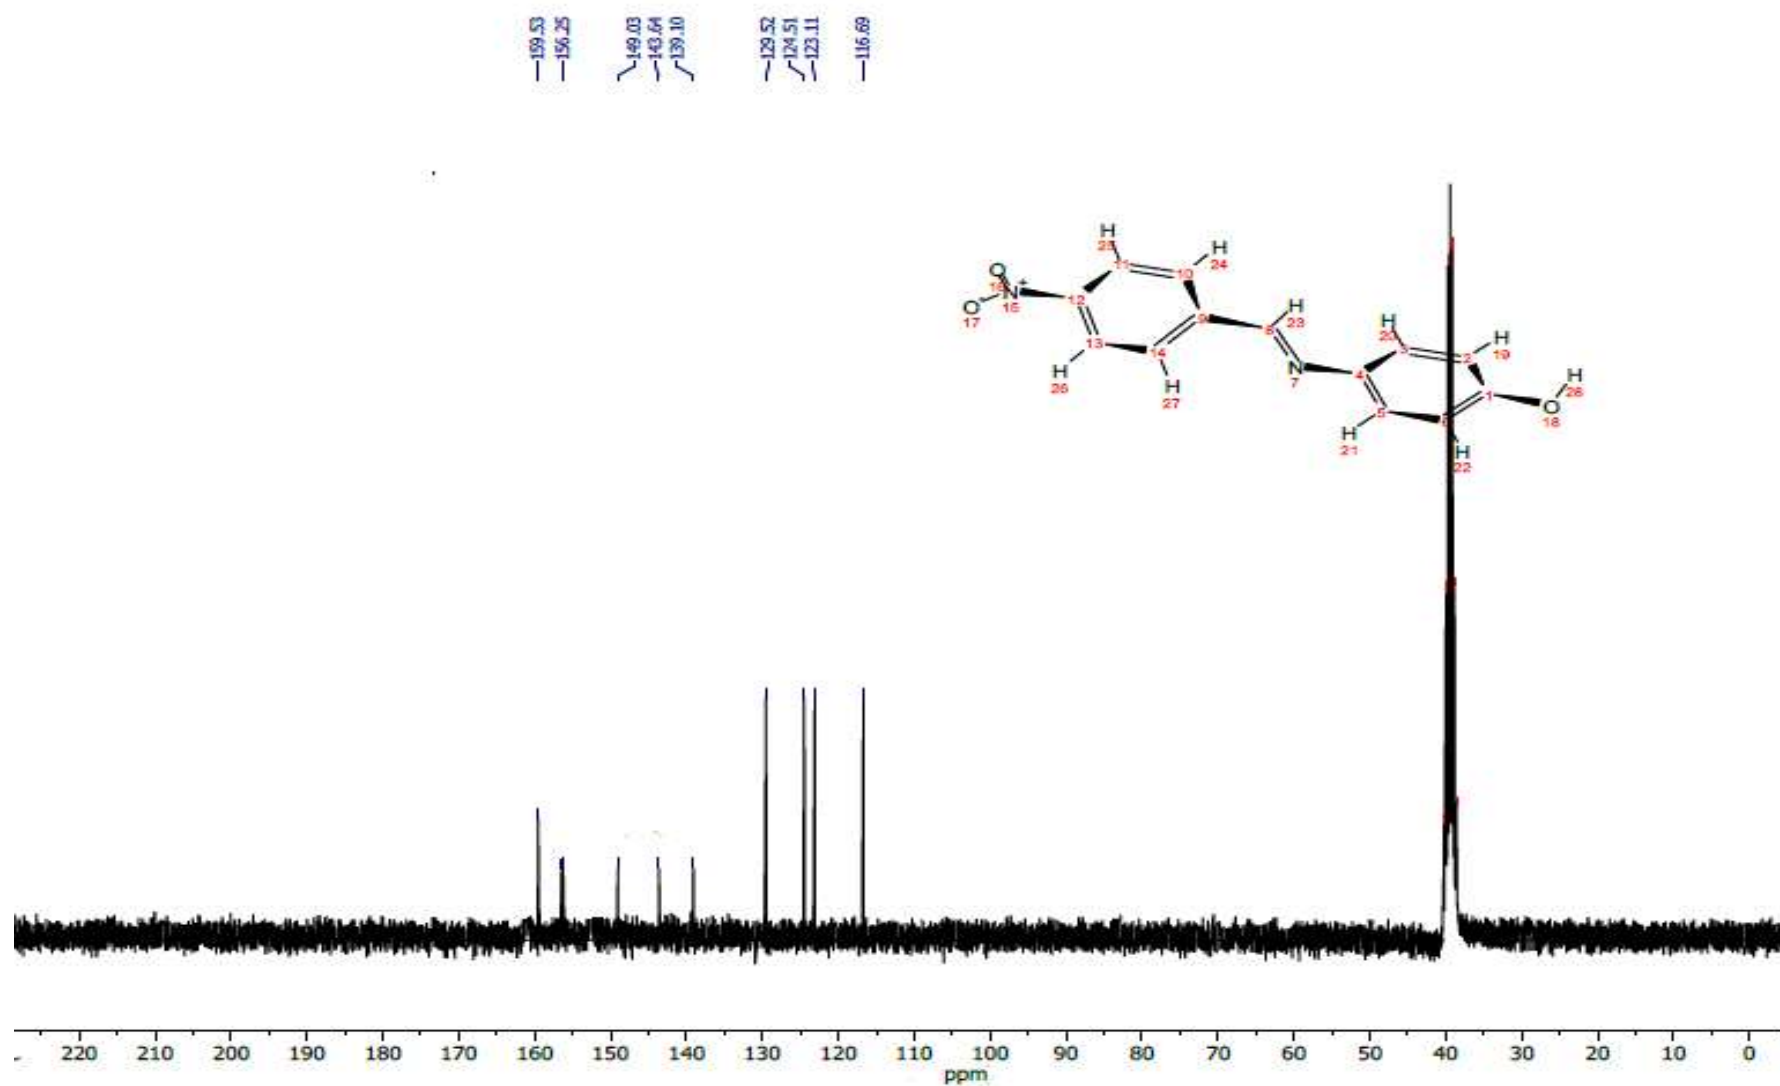

Figure S11:  $^{13}\text{C}$  NMR of Schiff base 4

Supplement: s1 [file s1]

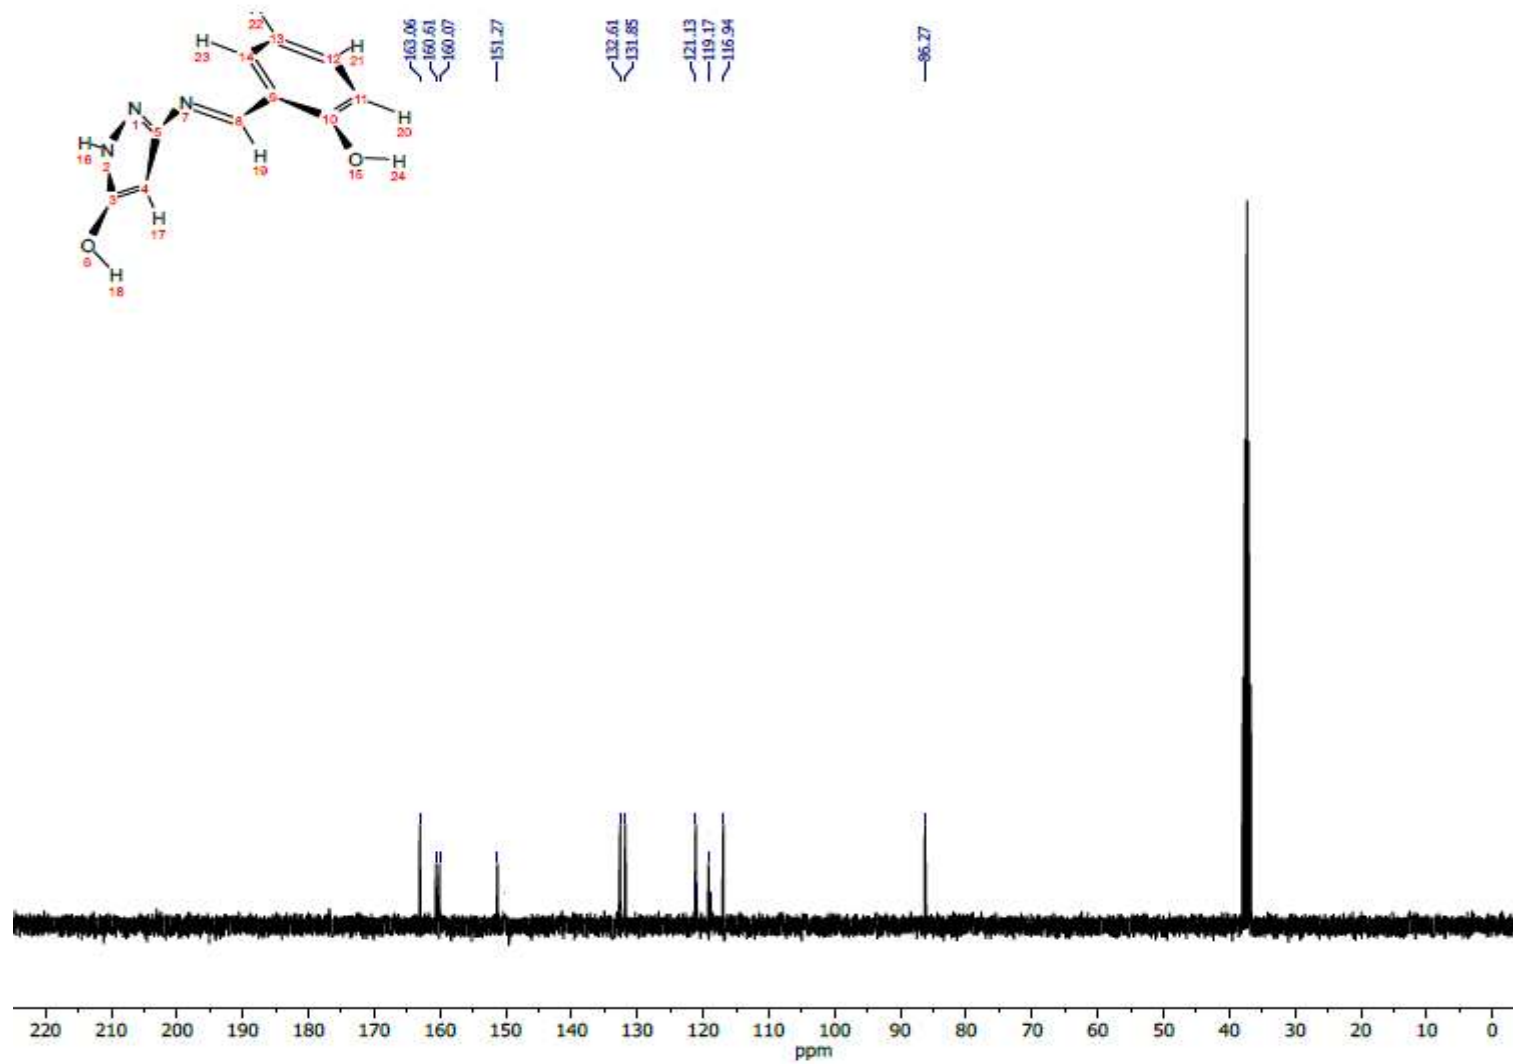

Figure S7:  $^{13}\text{C}$  NMR of Schiff base 2

Supplement: s1 [file s1]
